# Supplementary material for: Factor H preserves alternative complement function during ARDS, linked to improved survival
Source: PubMed Central journal article supplement — ERJ Open Res. 2023 Jun 26;9(3):00702-2022. doi: 10.1183/23120541.00702-2022 (PMC10291301; doi:10.1183/23120541.00702-2022), 2023-06-26
Supplement: 00702-2022.SUPPLEMENT.pdf [file 00702-2022.SUPPLEMENT.pdf]

Factor H preserves alternative complement function during ARDS linked to improved survival

William Bain, Mohammadreza Tabary, Sara R. Moore, Xiaojing An, Georgios D. Kitsios, Bryan J. McVerry, Prabir Ray, Anuradha Ray, Rama K. Mallampalli, Viviana P. Ferreira, Janet S. Lee, S. Mehdi Nouraie

### **Supplemental Materials**

**Table S1: Summary of key characteristics of included cohorts**

| <b>Cohort</b> | <b>Dates of enrollment</b>   | <b>Key Inclusion Criteria</b>                       | <b>Key Exclusion Criteria</b>                                                                       | <b>Biospecimens</b> |
|---------------|------------------------------|-----------------------------------------------------|-----------------------------------------------------------------------------------------------------|---------------------|
| LARMA         | February 1998 - June 1999    | ARDS <sup>1</sup>                                   | Chronic medical conditions including respiratory failure; estimated 6-month mortality >50%; age <18 | Serum               |
| SAILS         | March 2010 – September 2013  | ARDS <sup>1</sup> with known or suspected infection | Chronic medical conditions ; >5 times ULN of CK/AST/ALT                                             | EDTA Plasma         |
| ALIR          | October 2011 - December 2017 | ARDS <sup>2,3</sup> ; Age 18-90 years               | Chronic respiratory failure; tracheostomy; hemoglobin <8 g/dL                                       | Serum               |

Abbreviations: ALIR = University of Pittsburgh Acute Lung Injury Registry and Biospecimen Repository cohort; ALT = alanine transaminase; ARDS = acute respiratory distress syndrome; AST = aspartate transaminase; CK = creatine kinase; LARMA = Lisofylline And Respiratory Management of Acute lung injury clinical trial cohort; SAILS = Statins for Acutely Injured Lungs from Sepsis clinical trial cohort; ULN = upper limit of normal.

<sup>1</sup>Acute respiratory distress syndrome was defined in the LARMA and SAILS trials by the 1994 American-European Consensus Conference on ARDS as described in “Bernard GR et al. The American-European Consensus Conference on ARDS. Definitions, mechanisms, relevant outcomes, and clinical trial coordination. *Am J Respir Crit Care Med.* 1994 Mar;149(3 Pt 1):818-24. doi: 10.1164/ajrccm.149.3.7509706.”

<sup>2</sup>Acute respiratory distress syndrome was defined in ALIR by the 2012 Berlin Definition as described in “Acute Respiratory Distress Syndrome: The Berlin Definition, *JAMA.* 2012;307(23):2526-2533. doi:10.1001/jama.2012.5669.”

<sup>3</sup>ALIR inclusion criteria are not limited to ARDS. However, the analyses in this paper are limited to those subjects in ALIR diagnosed with ARDS, N=107.

**Table S2: Comparison of meta-analyses using random and fixed effects models**

| <b>Meta-Analysis</b>       | <b>Fixed Effect HR<br/>(95% CI)</b> | <b>I<sup>2</sup></b> | <b>Random Effect<br/>HR (95% CI)</b> | <b>I<sup>2</sup></b> |
|----------------------------|-------------------------------------|----------------------|--------------------------------------|----------------------|
| AH50>Median                | 0.65 (0.45-0.96)                    | 0.00%                | 0.66 (0.45-0.96)                     | 0.00%                |
| Factor B<25%<br>percentile | 1.99 (1.44-2.75)                    | 0.00%                | 1.98 (1.42-2.77)                     | 4.56%                |
| Factor H<25<br>percentile  | 1.52 (1.09-2.11)                    | 0.00%                | 1.52 (1.09-2.11)                     | 0.00%                |

Abbreviations: CI = confidence interval; HR = hazard ratio for mortality; I<sup>2</sup> = heterogeneity statistic

## Supplemental Figures

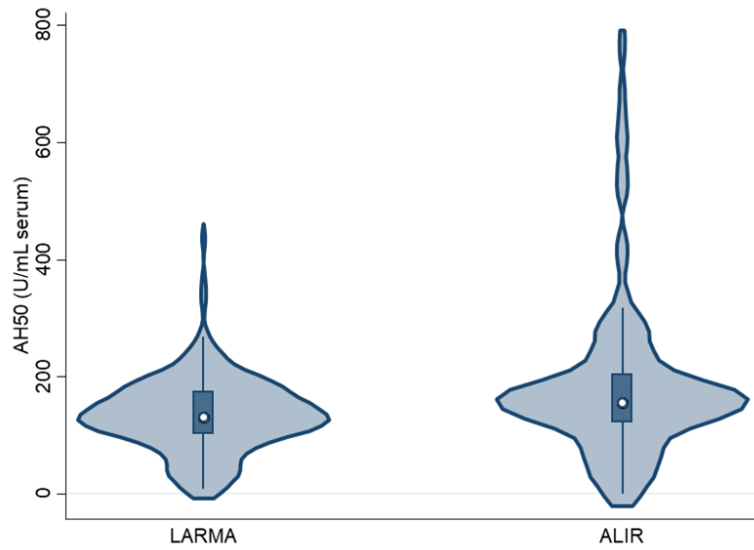

**Figure S1.** Distribution of AH50 values in the ALIR and LARMA cohorts.

In the LARMA cohort (N=218), median AH50 was 131 U/mL with inter-quartile range 102-175 U/mL. In the ALIR cohort (N=107), median AH50 was 155 U/mL with inter-quartile range 123-206 U/mL.

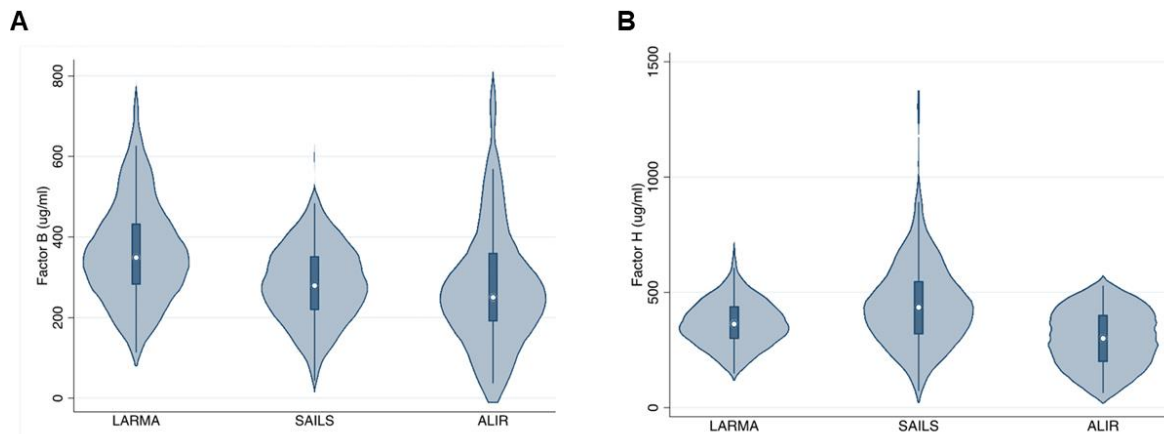

**Figure S2.** Distribution of circulating levels of Factor B and Factor H in LARMA, SAILS, and ALIR cohorts.

(A) Factor B levels in LARMA (N=218,  $\mu\text{g/mL}$ ; median 349, IQR 282-433), SAILS (N=224,  $\mu\text{g/mL}$ ; median 280, IQR 219-353), and ALIR (N=69,  $\mu\text{g/mL}$ ; median 250, IQR 190-361). The median Factor B level in pooled reference serum from healthy adults was 366  $\mu\text{g/mL}$  (IQR 285-378).

(B) Factor H levels in LARMA (N=218,  $\mu\text{g/mL}$ ; median 363, IQR 298-440), SAILS (N=224,  $\mu\text{g/mL}$ ; median 435, IQR 318-549), and ALIR (N=69,  $\mu\text{g/mL}$ ; median 301, IQR 199-402). The median Factor H level in pooled reference serum from healthy adults was 454  $\mu\text{g/mL}$  (IQR 401-482).
